# Supplementary material for: Aun (n = 1–16) clusters on the ZrO2(111) surface: a DFT+U investigation
Source: Royal Society of Chemistry journal article supplement (doi:10.1039/c6cp05977e), 2016-01-01
Supplement: c6cp05977e1.pdf [file c6cp05977e1.pdf]

# Au<sub>n</sub> (n=1-16) clusters on ZrO<sub>2</sub> (111) surface: a DFT+U investigation

M.-X. Liang L. Zhao J. Jia\* and H.-S. Wu

The School of Chemical and Material Science, Shanxi Normal University, No. 1, Gongyuan Street, Linfen, China, 041004. Key Laboratory of Magnetic Molecules & Magnetic Information Materials Ministry of Education, Shanxi Normal University, Linfen, China, 041004.

## 1. The lattice parameters and coordinates of the ZrO<sub>2</sub> (111) surface

```
&CELL
ABC 22.4785 22.5969 26.0000
ALPHA_BETA_GAMMA 90.0000 90.0000 114.4575
&END CELL
&COORD
Zr 1.2563997579 13.8721000041 1.0227002421
O 3.1916997499 14.3301000498 0.3374002501
O 0.9299997924 11.8943000137 0.1467002076
Zr 4.3790998790 6.9303000582 1.0461001210
O 6.3156998706 7.4122001037 0.3742001294
O 4.0919999142 4.9152000685 0.1663000858
Zr -3.1137001210 6.9301999274 1.0460001210
O -1.1772001294 7.4121999729 0.3742001294
O 0.5617998317 9.6426999807 1.6653001683
O 2.2969997832 12.4200000006 2.2652002168
Zr 2.5133998151 10.5926000217 1.2694001849
Zr 0.6293998375 9.3117999423 3.9382001625
O 2.5660998291 9.7936999878 3.2663001709
O 2.7799998532 8.4084000388 0.5575001468
O 1.0870999021 5.6086000204 -0.0791999021
O 0.3422998727 7.2965999526 3.0583001273
Zr 0.8564998703 7.4317999988 0.9229001297
Zr 7.4928000000 0.0000001115 1.1019000000
O 9.4281999920 0.4580001573 0.4166000080
Zr 0.0000000000 -0.0000000192 1.1020000000
O 1.9353999920 0.4580000265 0.4168000080
O 3.6624999529 2.7000000348 1.6674000471
O 5.4207999040 5.4980000548 2.2835000960
Zr 5.6400999364 3.6456000758 1.2978000636
Zr 3.7430999584 2.3815999956 3.9940000416
O 5.6784999504 2.8395000414 3.3087000496
O 5.9271999743 1.4743000923 0.6370000257
O 3.4167999930 0.4036000052 3.1180000070
Zr 3.9716999912 0.5063000523 0.9750000088
O -2.0721000960 5.4980999240 2.2836000960
Zr 20.6256999364 3.6455003373 1.2979000636
```

Zr 2.1171999275 4.1565000166 1.1677000725  
O 0.1897999355 3.6941999710 1.8493000645  
O -0.0872000887 5.0813999189 4.5595000887  
O 1.6709998625 7.8795999388 5.1756001375  
O 2.4563998930 6.1296000073 2.0405001070  
Zr 1.8903998948 6.0270999599 4.1899001052  
O 2.1774999327 3.8557999764 3.5291000673  
O 0.4481999819 1.0383999577 2.8735000181  
Zr 0.2219999496 2.8876999364 3.8671000504  
O 4.7837999838 0.9293999921 5.2365000162  
O 1.7768999718 1.6163999439 4.9907000282  
Zr -6.2364002421 13.8720998733 1.0227002421  
O -4.3010002501 14.3300999190 0.3375002501  
O -2.5739002892 16.5720999274 1.5882002892  
O -0.8157003381 19.3701999473 2.2042003381  
Zr -0.5963003057 17.5176999683 1.2186003057  
Zr -2.4933002837 16.2536998882 3.9148002837  
O -0.5579002917 16.7115999339 3.2295002917  
O -0.3092002678 15.3463999849 0.5577002678  
O -2.0386002187 12.5289999661 -0.0977997813  
O -2.8197002492 14.2757998977 3.0388002492  
Zr -2.2647002510 14.3783999448 0.8957002510  
O -8.3086003381 19.3702998165 2.2043003381  
Zr 14.3892996943 17.5176002299 1.2186003057  
Zr -4.1193003147 18.0286999091 1.0884003147  
O -6.0466003066 17.5661998636 1.7700003066  
O -6.3236003308 18.9535998114 4.4802003308  
O -3.7801003491 20.0016998998 1.9612003491  
Zr -4.3460003473 19.8991998524 4.1106003473  
O -4.0589003094 17.7278998689 3.4498003094  
O -5.7883002602 14.9105998502 2.7943002602  
Zr -6.0145002925 16.7598998289 3.7878002925  
Zr -7.8690003562 20.4101997932 3.9805003562  
O -5.1958002168 12.4199998698 2.2652002168  
Zr 17.4989998151 10.5924002833 1.2693001849  
Zr -1.0103001937 11.0989999623 1.1469001937  
O -2.9385001852 10.6100999171 1.8128001852  
O -3.1878002099 12.0241998648 4.5574002099  
O -1.4527002583 14.8014998846 5.1573002583  
O -0.7099002288 13.1068999524 2.0193002288  
Zr -1.2363002264 12.9740999058 4.1614002264  
O -0.9697001883 10.7898999229 3.4496001883  
O -2.6626001395 7.9900999044 2.8129001395  
Zr -2.8932001713 9.8132998829 3.8149001713  
Zr -4.7600002353 13.4804998464 4.0390002353  
O -4.4596002703 15.4884998364 4.9114002703  
Zr -1.6325001141 6.5380999007 4.0598001141  
O -1.2933001485 8.5110998913 4.9326001485  
Zr 3.3735996853 18.0286000399 1.0883003147

O 1.4461996934 17.5661999943 1.7700003066  
O 1.1693996692 18.9534999422 4.4802003308  
O 3.7120996509 20.0013000306 1.9608003491  
Zr 3.1467996527 19.8991999832 4.1107003473  
O 3.4338996906 17.7278999997 3.4499003094  
O 1.7045997398 14.9105999810 2.7943002602  
Zr 1.4784997075 16.7599999597 3.7879002925  
Zr 7.1166996438 20.4102000547 3.9805003562  
O 5.1893996518 19.9477000092 4.6621003482  
Zr -0.3761003562 20.4100999240 3.9804003562  
O -2.3035003482 19.9476998784 4.6622003482  
Zr 2.7327997647 13.4805999772 4.0388002353  
O 0.8045997733 12.9916999319 4.7050002267  
O 3.0332997297 15.4883999672 4.9115002703  
O 15.9157997924 11.8942002752 0.1467002076  
Zr 8.7492997579 13.8721001349 1.0227002421  
O 10.6846997499 14.3301001806 0.3375002501  
O 8.4226997924 11.8941001444 0.1466002076  
O 12.4117997108 16.5721001889 1.5882002892  
Zr 12.4923997163 16.2537001497 3.9148002837  
O 14.4277997083 16.7116001954 3.2295002917  
O 14.6764997322 15.3464002464 0.5578002678  
O 12.9471997813 12.5290002277 -0.0977997813  
O 12.1660997508 14.2757001593 3.0387002492  
Zr 12.7209997490 14.3784002064 0.8957002510  
O 4.9191997108 16.5720000581 1.5881002892  
O 6.6771996619 19.3702000781 2.2043003381  
Zr 6.8964996943 17.5176000991 1.2186003057  
Zr 4.9995997163 16.2536000189 3.9148002837  
O 6.9349997083 16.7116000647 3.2296002917  
O 7.1835997322 15.3464001156 0.5578002678  
O 5.4542997813 12.5291000969 -0.0977997813  
O 4.6729997508 14.2756000285 3.0388002492  
Zr 5.2281997490 14.3785000756 0.8959002510  
Zr 10.8664996853 18.0286001707 1.0884003147  
O 8.9390996934 17.5663001251 1.7700003066  
O 8.6620996692 18.9535000730 4.4802003308  
O 11.2056996509 20.0017001613 1.9612003491  
Zr 10.6396996527 19.8992001140 4.1106003473  
O 10.9267996906 17.7279001305 3.4498003094  
O 9.1974997398 14.9105001118 2.7943002602  
Zr 8.9712997075 16.7598000905 3.7878002925  
O 12.6821996518 19.9476001400 4.6622003482  
O 19.0776999142 4.9151003301 0.1662000858  
Zr 11.8719998790 6.9302001889 1.0460001210  
O 13.8085998706 7.4122002345 0.3742001294  
O 11.5848999142 4.9150001993 0.1663000858  
O 15.5475998317 9.6427002423 1.6653001683  
Zr 15.6150998375 9.3118002038 3.9382001625

O 17.5517998291 9.7937002493 3.2662001709  
O 17.7657998532 8.4084003003 0.5575001468  
O 16.0727999021 5.6086002819 -0.0791999021  
O 15.3279998726 7.2967002141 3.0583001274  
Zr 15.8422998703 7.4318002604 0.9229001297  
O 8.0547998317 9.6427001115 1.6654001683  
O 9.7898997832 12.4200001313 2.2652002168  
Zr 10.0061998151 10.5924001525 1.2692001849  
Zr 8.1222998375 9.3118000730 3.9381001625  
O 10.0588998291 9.7937001186 3.2663001709  
O 10.2729998532 8.4085001696 0.5577001468  
O 8.5798999021 5.6086001511 -0.0791999021  
O 7.8351998727 7.2966000834 3.0583001273  
Zr 8.3493998703 7.4318001296 0.9227001297  
Zr 13.9753998063 11.0991002239 1.1469001937  
O 12.0471998148 10.6101001786 1.8129001852  
O 11.7978997901 12.0242001264 4.5574002099  
O 13.5330997417 14.8015001462 5.1573002583  
O 14.2757997712 13.1070002139 2.0194002288  
Zr 13.7493997736 12.9741001673 4.1615002264  
O 14.0160998117 10.7899001844 3.4496001883  
O 12.3230998605 7.9901001660 2.8129001395  
Zr 12.0925998287 9.8133001445 3.8150001713  
O 15.7902997733 12.9917001935 4.7049002267  
Zr 6.4824998063 11.0991000931 1.1467001937  
O 4.5542998148 10.6102000478 1.8129001852  
O 4.3049997901 12.0241999956 4.5575002099  
O 6.0401997417 14.8015000154 5.1573002583  
O 6.7829997712 13.1069000831 2.0193002288  
Zr 6.2564997736 12.9739000366 4.1613002264  
O 6.5232998117 10.7900000536 3.4498001883  
O 4.8301998605 7.9900000352 2.8128001395  
Zr 4.5996998287 9.8132000137 3.8148001713  
Zr 10.2256997647 13.4806001080 4.0390002353  
O 8.2974997733 12.9916000627 4.7049002267  
O 10.5260997297 15.4885000980 4.9115002703  
Zr 14.9857000000 0.0000002423 1.1020000000  
O 16.9210999920 0.4580002881 0.4168000080  
O 18.6481999529 2.7000002964 1.6674000471  
Zr 18.7288999584 2.3816002572 3.9940000416  
O 20.6641999504 2.8395003029 3.3088000496  
O 20.9129999743 1.4743003539 0.6370000257  
O 18.4024999930 0.4037002668 3.1180000070  
Zr 18.9574999912 0.5063003139 0.9750000088  
O 11.1555999529 2.6999001656 1.6673000471  
O 12.9135999040 5.4982001855 2.2836000960  
Zr 13.1329999364 3.6456002066 1.2979000636  
Zr 11.2360999584 2.3815001264 3.9941000416  
O 13.1713999504 2.8395001721 3.3089000496

O 13.4199999743 1.4743002231 0.6370000257  
O 10.9093999930 0.4035001360 3.1180000070  
Zr 11.4645999912 0.5064001831 0.9751000088  
Zr 17.1028999275 4.1566002781 1.1677000725  
O 15.1755999355 3.6941002326 1.8492000645  
O 14.8985999113 5.0815001805 4.5595000887  
O 16.6567998625 7.8795002004 5.1756001375  
O 17.4420998930 6.1296002688 2.0405001070  
Zr 16.8761998948 6.0271002214 4.1899001052  
O 17.1631999327 3.8558002380 3.5291000673  
O 15.4338999819 1.0385002192 2.8736000181  
Zr 15.2076999496 2.8878001979 3.8671000504  
O 18.9186998940 6.0756002474 4.7415001060  
Zr 9.6099999275 4.1565001473 1.1676000725  
O 7.6825999355 3.6940001018 1.8494000645  
O 7.4057999113 5.0814000497 4.5595000887  
O 9.1638998625 7.8797000696 5.1757001375  
O 9.9485998930 6.1292001380 2.0401001070  
Zr 9.3832998948 6.0270000906 4.1900001052  
O 9.6702999327 3.8558001072 3.5291000673  
O 7.9410999819 1.0385000884 2.8735000181  
Zr 7.7148999496 2.8879000672 3.8672000504  
Zr 13.3531998859 6.5380001622 4.0598001141  
O 11.4257998940 6.0757001167 4.7413001060  
O 13.6923998515 8.5111001529 4.9325001485  
Zr 5.8602998859 6.5381000314 4.0597001141  
O 3.9328998940 6.0754999859 4.7414001060  
O 6.1987998515 8.5108000221 4.9322001485  
O 19.7694999838 0.9294002536 5.2365000162  
O 12.2766999838 0.9294001229 5.2365000162  
O 16.7625999718 1.6164002055 4.9907000282  
O 9.2697999718 1.6163000747 4.9907000282  
O -2.1785003236 18.5410999577 0.2455003236  
O -5.1834003357 19.2345999095 0.0000003357  
O 12.8071996764 18.5411002192 0.2455003236  
O 5.3143996764 18.5410000885 0.2455003236  
O 9.8022996643 19.2346001711 0.0001003357  
O 2.3093996643 19.2345000403 0.0000003357  
Zr -0.0115553782 4.8196910268 6.7927761331  
O 1.9332929357 5.2794515328 6.1601143382  
O -0.3440323290 2.7858867172 5.9328534325  
O 1.0897106340 3.4135202242 7.9645311876  
Zr 1.2651913345 1.5173926143 7.1110437881  
O 1.3140100411 0.8608346146 9.1635480888  
Zr -6.2426512584 18.5827656537 6.7035725741  
O -4.2952849662 19.0001118303 6.0701317493  
O -6.6076295394 16.5731834384 5.8580671923  
O -7.8356010922 20.0021480734 6.3383612875  
Zr -3.1221987736 11.7082192035 6.7654572081

O -1.1868750161 12.1965179258 6.1233794403  
O -3.4522477526 9.6541048892 5.9141897480  
O -5.1483321983 17.1450895096 7.8924608888  
Zr -4.9704995510 15.2989516480 7.0249766669  
O -4.9458497431 14.6356760367 9.1063061088  
O -4.6912824574 13.1855437730 6.3159080922  
O 13.4454953848 19.3756506337 10.7420473471  
O 14.3175232369 17.7833281940 7.7371683318  
O -2.0264954683 10.2816367577 7.9449717922  
Zr -1.8531676630 8.4150336375 7.0612828833  
O -1.8256478694 7.7720548454 9.1600092253  
O -1.5780146343 6.2722308918 6.3335350680  
O 16.6014616634 12.5747474778 10.7239995262  
O 17.4354101781 10.9286862059 7.7320347903  
O 19.6626221391 5.7067574159 10.7952044523  
O 20.5477094096 4.0642363188 7.7892722577  
Zr 1.2507145916 18.5810406368 6.7033682319  
O 3.1977272976 19.0003179507 6.0695081495  
O 0.8851772961 16.5732012022 5.8581818247  
O 7.1496076182 20.0014759256 6.3362582830  
O 5.4389406398 17.2191001742 5.6753595640  
O 4.6155205092 18.8611292193 8.6233348597  
Zr 5.2119980429 19.0380933978 6.5901691330  
O 9.1218044574 19.5712936350 8.4665683852  
O -0.3431513182 20.0000824955 6.3379417217  
O -2.0539741024 17.2190250633 5.6753432731  
O -2.8766470322 18.8601532812 8.6243820828  
Zr -2.2827464828 19.0370534754 6.5918863192  
O 1.6285415202 19.5722256503 8.4669481850  
O -5.8643308724 19.5719022132 8.4680432826  
O 0.5893399576 14.3352131414 7.3810617531  
O 2.3446533726 17.1450068053 7.8924041137  
Zr 2.5224522358 15.2985919321 7.0249638998  
Zr 0.5666527980 13.8456377250 9.5750650635  
O 2.5478843217 14.6365761339 9.1068224919  
O 2.8016894111 13.1851126627 6.3164125947  
O 1.0638061214 10.3429073232 5.6785833761  
O 0.2415115375 12.0170167148 8.6304910283  
Zr 0.8512932048 12.1748830168 6.6267277736  
Zr 6.5394972894 15.8131018167 6.8875714487  
O 4.5927340515 15.2879869505 7.5437995751  
O 4.4176947348 16.7010953581 10.2283260185  
O 5.9924396746 19.4192536640 10.7300061231  
O 6.8246840085 17.7844111415 7.7391842187  
Zr 6.3421251895 17.6779465736 9.8066660303  
O 6.6125981278 15.5035090840 9.1763147780  
O 4.6780486239 12.7075338369 8.5247110122  
Zr 4.6507879688 14.6274776587 9.4870426846  
Zr 10.1391157430 18.1131308883 9.6886480680

O 8.3303487732 17.5669799846 10.3874707455  
O 10.5089230812 20.1318798556 10.4757374511  
Zr -0.9538102052 15.8131793201 6.8870635950  
O -2.9002354509 15.2877205910 7.5437155532  
O -3.0784678370 16.6920318880 10.2262170517  
O -1.5453571055 19.3726545742 10.7650155214  
O -0.6684482823 17.7837145038 7.7399911174  
Zr -1.1550732689 17.6644167813 9.8092879303  
O -0.8807534622 15.5023869739 9.1768416157  
O -2.8151588914 12.7070002027 8.5244253599  
Zr -2.8446050259 14.6244725928 9.4871937766  
Zr 2.6444833326 18.1145658554 9.6889241655  
O 0.8372773680 17.5669614388 10.3874647929  
O 3.0180686473 20.1322384206 10.4758915838  
Zr -4.8488233183 18.1125903949 9.6896420165  
O -6.6554657139 17.5659565617 10.3872813867  
O -4.4771741857 20.1319626348 10.4774199996  
Zr 2.1659401774 8.9260756222 6.8999498572  
O 0.2152252051 8.4262322267 7.5529241853  
O 0.0504173022 9.8470614729 10.2344741140  
O 1.6158870324 12.5753009699 10.7240841781  
O 2.4494643967 10.9285355142 7.7322749999  
Zr 1.9642738468 10.8396712805 9.8204255977  
O 2.2422396862 8.6450547364 9.1717370686  
O 0.3062188531 5.8503155902 8.5304886573  
Zr 0.2832541931 7.7729044191 9.5061035681  
Zr 5.7612056572 11.2863881224 9.7322233723  
O 3.9513337260 10.7066574514 10.3991803854  
O 6.1375347602 13.2836558897 10.4728085550  
Zr -1.7330158578 11.2843076503 9.7333031150  
O -3.5429073324 10.7076505310 10.3994206561  
O -1.3560378254 13.2829689176 10.4726014715  
Zr 1.3779148709 4.4232891634 9.7443296170  
O -0.4287758166 3.8541010449 10.4071629557  
O 1.7554724235 6.4310493227 10.4791685723  
Zr 8.7430116483 18.5830094600 6.7023490212  
O 10.6903648725 19.0000986819 6.0685654678  
O 8.3777819328 16.5732505548 5.8582558204  
O 12.9315456479 17.2189372097 5.6749875332  
O 12.1061332741 18.8593706890 8.6198127664  
Zr 12.7039923414 19.0378539761 6.5903765265  
Zr 11.8637738094 11.7092903036 6.7642694047  
O 13.7989293197 12.1982889856 6.1222479317  
O 11.5313791845 9.6547637550 5.9115679099  
O 15.5749275416 14.3342117357 7.3807786351  
Zr 15.5512437285 13.8440292218 9.5753865270  
O 16.0496586899 10.3431985419 5.6781704265  
O 15.2273872824 12.0153991112 8.6299023117  
Zr 15.8372239695 12.1751488423 6.6262615589

Zr 4.3703134071 11.7065564486 6.7660494169  
O 6.3058282409 12.1953962383 6.1240144802  
O 4.0399706781 9.6543963977 5.9135642776  
O 8.0823849659 14.3343830077 7.3810603671  
O 9.8370920655 17.1448743486 7.8921721457  
Zr 10.0155223879 15.2993502118 7.0248577849  
Zr 8.0610232132 13.8438060144 9.5746410960  
O 10.0399399182 14.6354696649 9.1066548275  
O 10.2938977602 13.1857777397 6.3160081353  
O 8.5568403294 10.3435121967 5.6784954146  
O 7.7331662125 12.0165512872 8.6309009451  
Zr 8.3435150735 12.1755734021 6.6277843360  
Zr 14.0325775217 15.8123371703 6.8855786377  
O 12.0859055442 15.2870789367 7.5437055374  
O 11.9075331128 16.6923139287 10.2256839897  
Zr 13.8319562566 17.6623662616 9.8035565748  
O 14.1049759038 15.5016623983 9.1762169923  
O 12.1686297533 12.7041201555 8.5268373855  
Zr 12.1420460726 14.6230734787 9.4870358384  
Zr 14.9740670742 4.8208682420 6.7914560152  
O 16.9199593953 5.2798972092 6.1599305326  
O 14.6411101418 2.7861146584 5.9319547580  
O 18.7072189048 7.4285588546 7.3960927819  
Zr 18.6669265099 6.9828658599 9.6142593335  
O 19.1961381748 3.4329184507 5.6921674256  
O 18.3470234670 5.1458461326 8.6867305103  
Zr 18.9606309382 5.2763315760 6.6697310278  
Zr 7.4754112061 4.8077902653 6.7920903461  
O 9.4223334942 5.2350955076 6.1531111511  
O 7.1420957924 2.7830165164 5.9293141013  
O 11.2092324775 7.4263525390 7.3913999621  
O 12.9613565301 10.2843133982 7.9341690965  
Zr 13.1330268356 8.4158784802 7.0526588243  
Zr 11.1788397935 6.9811475035 9.5938289579  
O 13.1616766643 7.7739439881 9.1119453226  
O 13.4055375887 6.2699797115 6.3313460401  
O 11.7049519117 3.4310211785 5.6913800188  
O 10.8476961642 5.1417131637 8.6818059493  
Zr 11.4644853003 5.2709345298 6.6679942992  
Zr 17.1520795624 8.9267763754 6.8997415736  
O 15.2045207029 8.4272348417 7.5493706305  
O 15.0338561647 9.8460081902 10.2332725664  
Zr 16.9502567021 10.8390832627 9.8198744370  
O 17.2263164176 8.6453870134 9.1717094257  
O 15.2921880703 5.8498495143 8.5298777969  
Zr 15.2666547761 7.7707135207 9.4982043756  
O 3.7186364253 7.4284621959 7.3933200230  
O 5.4661814421 10.2779562980 7.9475165295  
Zr 5.6425381640 8.4104707114 7.0562302280



Zr 3.6810000135 6.9776909449 9.6072573208  
O 5.6849346531 7.7190930216 9.1132534264  
O 5.9170827613 6.2671279370 6.3314089213  
O 4.2106591061 3.4325019546 5.6932545085  
O 3.3596470004 5.1451091823 8.6862786857  
Zr 3.9745387795 5.2756447292 6.6699735419  
Zr 9.6585040093 8.9291184671 6.8994376233  
O 7.7119562808 8.4256314698 7.5501821007  
O 7.5450321578 9.8409465999 10.2328795377  
O 9.1130901903 12.5706685532 10.7227922752  
O 9.9429026540 10.9286688341 7.7346124575  
Zr 9.4666320396 10.8305389840 9.8240419013  
O 9.7350341177 8.6437398279 9.1679666043  
O 7.8075314455 5.8357409614 8.5300931296  
Zr 7.7822213546 7.7638850364 9.4995002851  
Zr 13.2571752829 11.2744567018 9.7290296752  
O 11.4612789385 10.6539927466 10.3970044235  
O 13.6293038996 13.2812321970 10.4717524486  
O 21.8196655055 0.5820724421 7.4040526974  
Zr 21.7825562435 0.0799998230 9.6035406794  
O 14.3221452320 0.5824996416 7.3993573532  
O 16.0755082081 3.4167605332 7.9627171445  
Zr 16.2504290677 1.5223330162 7.1019886156  
Zr 14.2916943551 0.0889915905 9.5923820833  
O 16.3010048277 0.8600989322 9.1182179067  
Zr 20.2781323177 2.0530947492 6.9572515375  
O 18.3234090363 1.5727222239 7.5556159727  
O 18.1698300895 2.9394548763 10.2427639873  
Zr 20.0445700401 3.9721289155 9.8710024329  
O 20.3502513565 1.7818902088 9.1763199389  
Zr 18.4034636433 0.8755441716 9.5029331283  
O 6.8332121445 0.5792746316 7.4050533717  
O 8.5412845449 3.3780864562 7.9798682746  
Zr 8.7551420295 1.5071003464 7.1092694821  
Zr 6.7999062478 0.0771226264 9.6131153586  
O 8.8076493466 0.8542064676 9.1682974162  
Zr 12.7831019036 2.0500434300 6.9543260284  
O 10.8262467305 1.5716653888 7.5593753507  
O 10.6785062469 2.9413375290 10.2434567023  
O 12.2307568192 5.7189538236 10.7380325178  
O 13.0555434679 4.0622548513 7.7850243246  
Zr 12.5627643826 3.9641731836 9.8588886282  
O 12.8586613402 1.7817724357 9.1748484718  
Zr 10.9112026827 0.8754367913 9.5112205276  
Zr 16.3661301404 4.4232575284 9.7433791932  
O 14.5616901258 3.8487259810 10.4067618083  
O 16.7408339607 6.4314364089 10.4790379064  
Zr 5.2922166450 2.0512723575 6.9595551661  
O 3.3349161834 1.5711021237 7.5592223990

O 3.1887099160 2.9407192436 10.2443867918  
 O 4.6748339022 5.7084443863 10.7961438671  
 O 5.5616784035 4.0633041013 7.7936561608  
 Zr 5.0667949559 3.9712356563 9.8816765996  
 O 5.3682492878 1.7818466353 9.1784493010  
 Zr 3.4207073126 0.8767687492 9.5106496507  
 Zr 8.8628761933 4.4121812752 9.7501882140  
 O 7.0649255687 3.8563982842 10.4646428426  
 O 9.2529704138 6.4284831896 10.4783783781  
 &END COORD

**2. The structure and relative energies ( $E_{rel}$ , eV) of the considered  $Au_n/ZrO_2$  (Structures with 3D  $Au_n$  clusters were labelled in red color.)**

| No.          | Structure                                                                           | $E_{rel}$ | No. | Structure                                                                            | $E_{rel}$ |
|--------------|-------------------------------------------------------------------------------------|-----------|-----|--------------------------------------------------------------------------------------|-----------|
| $Au/ZrO_2$   |                                                                                     |           |     |                                                                                      |           |
| 1-1<br>(1)   | 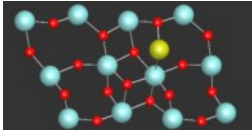   | 0.00      | 1-3 |    | 0.37      |
| 1-2          |   | 0.002     |     |                                                                                      |           |
| $Au_2/ZrO_2$ |                                                                                     |           |     |                                                                                      |           |
| 2-1<br>(2)   |  | 0.00      | 2-3 |  | 0.35      |
| 2-2          |  | 0.14      | 2-4 |  | 2.02      |
| $Au_3/ZrO_2$ |                                                                                     |           |     |                                                                                      |           |
| 3-1<br>(3)   |  | 0.00      | 3-2 |  | 0.24      |
| 3-3          |  | 0.29      | 3-4 |  | 0.39      |
| 3-5          |  | 0.43      | 3-6 |  | 0.82      |
| $Au_4/ZrO_2$ |                                                                                     |           |     |                                                                                      |           |

|              |                                                                                     |      |      |                                                                                      |      |
|--------------|-------------------------------------------------------------------------------------|------|------|--------------------------------------------------------------------------------------|------|
| 4-1<br>(4)   | 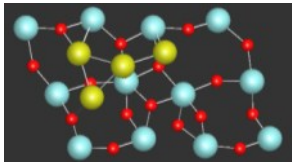    | 0.00 | 4-2  |     | 0.99 |
| 4-3          |    | 0.70 | 4-4  |    | 0.94 |
| 4-5          |    | 0.74 | 4-6  |    | 0.47 |
| 4-7          |    | 0.72 | 4-8  |    | 0.58 |
| $Au_5/ZrO_2$ |                                                                                     |      |      |                                                                                      |      |
| 5-1<br>(5)   |    | 0.00 | 5-2  |    | 0.19 |
| 5-3          |  | 0.20 | 5-4  |  | 0.44 |
| 5-5          |  | 0.37 | 5-6  |  | 0.55 |
| 5-7          |  | 0.62 | 5-8  |  | 0.36 |
| 5-9          |  | 0.01 | 5-10 |  | 0.04 |
| 5-11         |  | 0.05 | 5-12 |  | 0.43 |
| $Au_6/ZrO_2$ |                                                                                     |      |      |                                                                                      |      |

|              |                                                                                     |      |      |                                                                                      |      |
|--------------|-------------------------------------------------------------------------------------|------|------|--------------------------------------------------------------------------------------|------|
| 6-1<br>(6)   | 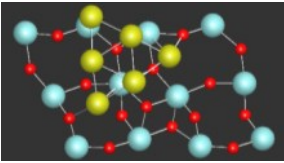   | 0.00 | 6-2  |    | 0.10 |
| 6-3          |    | 0.30 | 6-4  |    | 0.64 |
| 6-5          |    | 1.13 | 6-6  |    | 0.03 |
| 6-7          |    | 0.37 | 6-8  |    | 0.61 |
| 6-9          |    | 0.74 |      |                                                                                      |      |
| $Au_7/ZrO_2$ |                                                                                     |      |      |                                                                                      |      |
| 7-1<br>(7)   |  | 0.00 | 7-2  |  | 0.42 |
| 7-3          |  | 0.30 | 7-4  |  | 0.44 |
| 7-5          |  | 0.66 | 7-6  |  | 0.67 |
| 7-7          |  | 0.53 | 7-8  |  | 0.12 |
| 7-9          |  | 0.60 | 7-10 |  | 0.07 |

|                          |                                                                                     |      |            |                                                                                      |             |
|--------------------------|-------------------------------------------------------------------------------------|------|------------|--------------------------------------------------------------------------------------|-------------|
| 7-11                     | 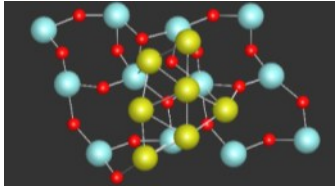   | 0.53 | 7-12       |    | 0.58        |
| 7-13                     |    | 0.07 | 7-14       |    | 0.28        |
| 7-15                     |    | 0.24 |            |                                                                                      |             |
| $Au_8/ZrO_2$             |                                                                                     |      |            |                                                                                      |             |
| <b>8-1</b><br><b>(8)</b> |   | 0.00 | 8-2        |   | 0.19        |
| 8-3                      |  | 0.44 | 8-4        |  | 0.42        |
| 8-5                      |  | 0.23 | <b>8-6</b> |  | <b>0.57</b> |
| 8-7                      |  | 0.29 | 8-8        |  | 0.14        |
| 8-9                      |  | 0.16 | 8-10       |  | 0.25        |

|                            |                                                                                     |      |      |                                                                                      |      |
|----------------------------|-------------------------------------------------------------------------------------|------|------|--------------------------------------------------------------------------------------|------|
| 8-11                       | 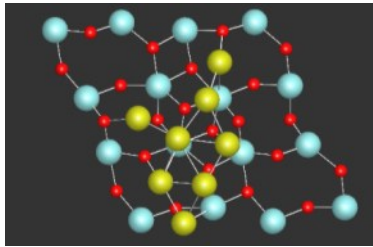    | 0.37 | 8-12 |     | 0.14 |
| 8-13                       |    | 0.19 | 8-14 |    | 0.60 |
| 8-15                       |    | 0.25 | 8-16 |    | 0.54 |
| $\text{Au}_9/\text{ZrO}_2$ |                                                                                     |      |      |                                                                                      |      |
| 9-1<br>(9)                 |   | 0.00 | 9-2  |   | 0.89 |
| 9-3                        |  | 0.66 | 9-4  |  | 0.66 |
| 9-5                        |  | 0.47 | 9-6  |  | 0.73 |
| 9-7                        |  | 0.59 | 9-8  |  | 1.16 |

|                               |                                                                                     |      |      |                                                                                      |      |
|-------------------------------|-------------------------------------------------------------------------------------|------|------|--------------------------------------------------------------------------------------|------|
| 9-9                           | 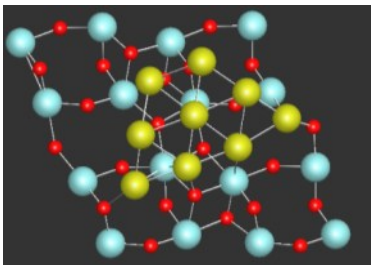   | 0.73 | 9-10 |    | 0.53 |
| 9-11                          |    | 1.00 | 9-12 |    | 1.02 |
| 9-13                          |    | 1.59 | 9-14 |    | 0.58 |
| 9-15                          |   | 0.62 | 9-16 |   | 1.01 |
| 9-17                          |  | 0.33 |      |                                                                                      |      |
| $\text{Au}_{10}/\text{ZrO}_2$ |                                                                                     |      |      |                                                                                      |      |
| 10-1<br>(10)                  |  | 0.00 | 10-2 |  | 1.14 |
| 10-3                          |  | 1.68 | 10-4 |  | 1.30 |

|                               |                                                                                     |      |       |                                                                                      |      |
|-------------------------------|-------------------------------------------------------------------------------------|------|-------|--------------------------------------------------------------------------------------|------|
| 10-5                          | 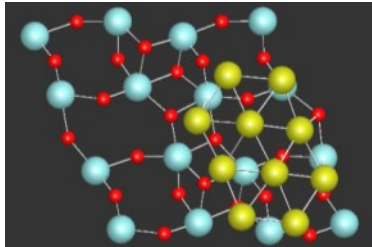    | 1.87 | 10-6  |     | 1.75 |
| 10-7                          |    | 1.06 | 10-8  |    | 1.79 |
| 10-9                          |    | 1.85 | 10-10 |    | 1.29 |
| 10-11                         |   | 1.01 | 10-12 |   | 1.11 |
| $\text{Au}_{11}/\text{ZrO}_2$ |                                                                                     |      |       |                                                                                      |      |
| 11-1<br>(11)                  |  | 0.00 | 11-2  |  | 1.64 |
| 11-3                          |  | 1.00 | 11-4  |  | 0.74 |
| 11-5                          |  | 1.11 | 11-6  |  | 0.94 |



|       |                                                                                     |      |       |                                                                                      |      |
|-------|-------------------------------------------------------------------------------------|------|-------|--------------------------------------------------------------------------------------|------|
| 11-7  | 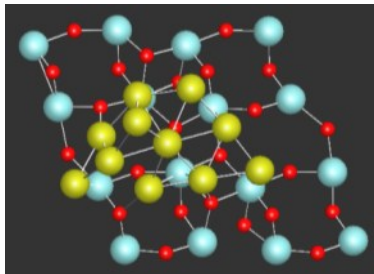   | 1.53 | 11-8  |    | 0.99 |
| 11-9  |    | 0.83 | 11-10 |    | 1.12 |
| 11-11 |    | 1.61 | 11-12 |    | 0.72 |
| 11-13 |   | 1.28 | 11-14 |   | 1.09 |
| 11-15 |  | 0.83 | 11-16 |  | 0.41 |
| 11-17 |  | 0.12 | 11-18 |  | 0.32 |
| 11-19 |  | 0.28 | 11-20 |  | 1.29 |

|                               |                                                                                     |      |       |                                                                                      |      |
|-------------------------------|-------------------------------------------------------------------------------------|------|-------|--------------------------------------------------------------------------------------|------|
| 11-21                         | 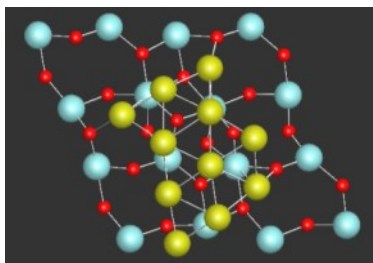   | 0.04 | 11-22 |    | 0.10 |
| 11-23                         |    | 0.12 | 11-24 |    | 0.33 |
| $\text{Au}_{12}/\text{ZrO}_2$ |                                                                                     |      |       |                                                                                      |      |
| 12-1<br>(12)                  |    | 0.00 | 12-2  |    | 0.91 |
| 12-3                          |   | 1.45 | 12-4  |   | 1.29 |
| 12-5                          |  | 1.66 | 12-6  |  | 1.38 |
| 12-7                          |  | 0.63 | 12-8  |  | 0.95 |
| 12-9                          |  | 1.46 | 12-10 |  | 1.37 |

|                               |                                                                                     |      |       |                                                                                      |      |
|-------------------------------|-------------------------------------------------------------------------------------|------|-------|--------------------------------------------------------------------------------------|------|
| 12-11                         | 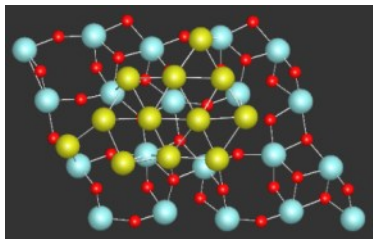   | 1.37 | 12-12 |    | 1.00 |
| 12-13                         |    | 0.26 | 12-14 |    | 0.50 |
| 12-15                         |    | 0.17 | 12-16 |    | 2.19 |
| 12-17                         |   | 0.45 | 12-18 |   | 0.41 |
| 12-19                         |  | 0.56 | 12-20 |  | 0.66 |
| $\text{Au}_{13}/\text{ZrO}_2$ |                                                                                     |      |       |                                                                                      |      |
| 13-1<br>(13)                  |  | 0.00 | 13-2  |  | 0.77 |
| 13-3                          |  | 0.72 | 13-4  |  | 0.45 |

|       |                                                                                     |      |       |                                                                                      |      |
|-------|-------------------------------------------------------------------------------------|------|-------|--------------------------------------------------------------------------------------|------|
| 13-5  | 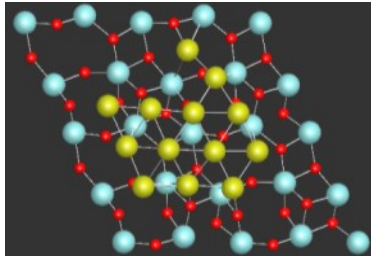   | 1.21 | 13-6  |    | 1.01 |
| 13-7  |    | 1.12 | 13-8  |    | 0.77 |
| 13-9  |    | 0.85 | 13-10 |    | 0.89 |
| 13-11 |   | 0.72 | 13-12 |   | 0.32 |
| 13-13 |  | 0.45 | 13-14 |  | 0.73 |
| 13-15 |  | 0.95 | 13-16 |  | 0.84 |
| 13-17 |  | 0.22 | 13-18 |  | 1.07 |

|                               |                                                                                     |      |       |                                                                                      |      |
|-------------------------------|-------------------------------------------------------------------------------------|------|-------|--------------------------------------------------------------------------------------|------|
| 13-19                         | 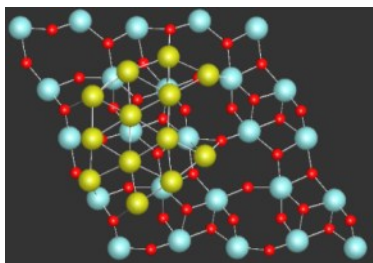   | 0.45 | 13-20 |    | 0.30 |
| 13-21                         |    | 1.41 | 13-22 |    | 0.49 |
| 13-23                         |    | 0.39 | 13-24 |    | 0.42 |
| 13-25                         |   | 0.77 | 13-26 |   | 0.91 |
| 13-27                         |  | 1.94 |       |                                                                                      |      |
| $\text{Au}_{14}/\text{ZrO}_2$ |                                                                                     |      |       |                                                                                      |      |
| 14-1<br>(14)                  |  | 0.00 | 14-2  |  | 0.46 |
| 14-3                          |  | 0.30 | 14-4  |  | 0.12 |

|       |                                                                                     |      |       |                                                                                      |      |
|-------|-------------------------------------------------------------------------------------|------|-------|--------------------------------------------------------------------------------------|------|
| 14-5  | 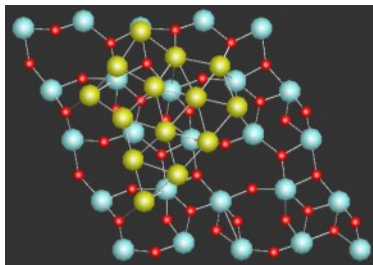   | 0.44 | 14-6  |    | 0.17 |
| 14-7  |    | 0.15 | 14-8  |    | 0.16 |
| 14-9  |    | 0.20 | 14-10 |    | 0.84 |
| 14-11 |  | 0.31 | 14-12 |  | 0.91 |
| 14-13 |  | 0.31 | 14-14 |  | 0.22 |
| 14-15 |  | 0.39 | 14-16 |  | 0.68 |
| 14-17 |  | 0.72 | 14-18 |  | 0.71 |

|                               |                                                                                     |      |       |                                                                                      |      |
|-------------------------------|-------------------------------------------------------------------------------------|------|-------|--------------------------------------------------------------------------------------|------|
| 14-19                         | 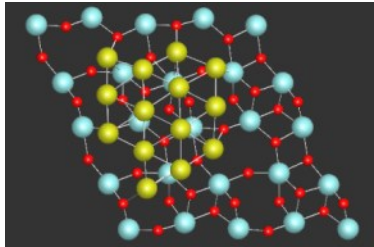    | 0.38 | 14-20 |     | 0.45 |
| 14-21                         |    | 1.18 | 14-22 |    | 0.43 |
| 14-23                         |    | 1.89 |       |                                                                                      |      |
| $\text{Au}_{15}/\text{ZrO}_2$ |                                                                                     |      |       |                                                                                      |      |
| 15-1<br>(15)                  |   | 0.00 | 15-2  |   | 0.79 |
| 15-3                          |  | 0.30 | 15-4  |  | 0.35 |
| 15-5                          |  | 0.21 | 15-6  |  | 0.17 |
| 15-7                          |  | 0.16 | 15-8  |  | 0.36 |

|       |                                                                                     |      |       |                                                                                      |      |
|-------|-------------------------------------------------------------------------------------|------|-------|--------------------------------------------------------------------------------------|------|
| 15-9  | 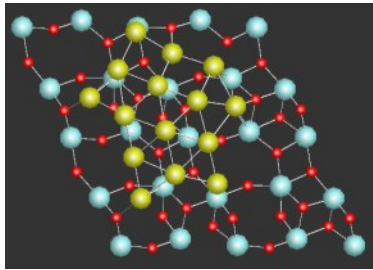   | 0.30 | 15-10 |    | 0.65 |
| 15-11 |    | 0.78 | 15-12 |    | 0.09 |
| 15-13 |    | 0.09 | 15-14 |    | 0.82 |
| 15-15 |   | 0.70 | 15-16 |   | 0.65 |
| 15-17 |  | 0.56 | 15-18 |  | 0.37 |
| 15-19 |  | 1.66 | 15-20 |  | 0.21 |
| 15-21 |  | 0.61 | 15-22 |  | 0.70 |



|                               |                                                                                     |      |       |                                                                                      |      |
|-------------------------------|-------------------------------------------------------------------------------------|------|-------|--------------------------------------------------------------------------------------|------|
| 15-23                         | 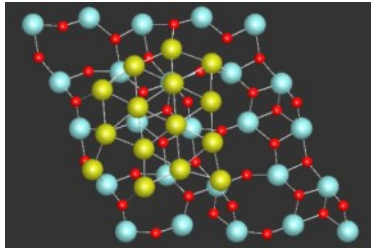   | 0.21 | 15-24 |    | 0.62 |
| 15-25                         |    | 0.86 | 15-26 |    | 1.34 |
| 15-27                         |    | 0.58 | 15-28 |    | 2.07 |
| $\text{Au}_{16}/\text{ZrO}_2$ |                                                                                     |      |       |                                                                                      |      |
| 16-1<br>(16)                  |  | 0.00 | 16-2  |  | 0.15 |
| 16-3                          |  | 0.14 | 16-4  |  | 0.53 |
| 16-5                          |  | 0.73 | 16-6  |  | 0.48 |
| 16-7                          |  | 0.88 | 16-8  |  | 0.13 |

|       |                                                                                     |      |       |                                                                                      |      |
|-------|-------------------------------------------------------------------------------------|------|-------|--------------------------------------------------------------------------------------|------|
| 16-9  | 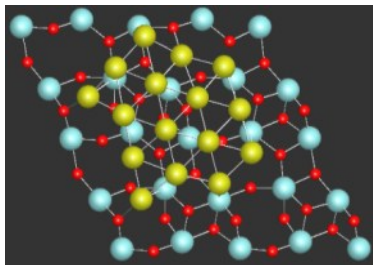   | 0.40 | 16-10 |    | 0.15 |
| 16-11 |    | 0.42 | 16-12 |    | 0.58 |
| 16-13 |    | 0.14 | 16-14 |    | 0.91 |
| 16-15 |   | 0.20 | 16-16 |   | 0.69 |
| 16-17 |  | 0.31 | 16-18 |  | 0.71 |
| 16-19 |  | 0.89 | 16-20 |  | 0.31 |
| 16-21 |  | 0.43 | 16-22 |  | 0.50 |

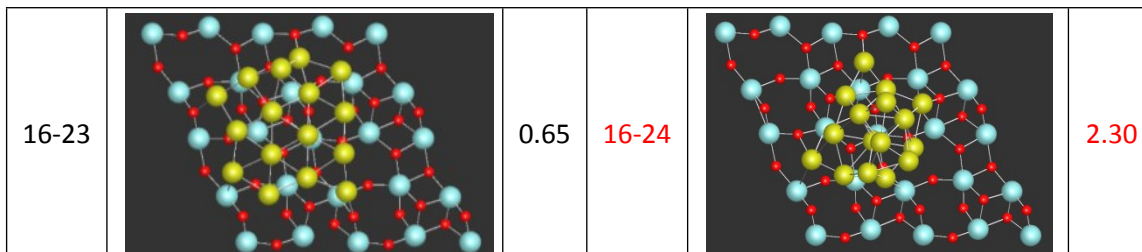

### 3. The detailed charge distributions for $\text{Au}_{10}/\text{ZrO}_2$ and $\text{Au}_{16}/\text{ZrO}_2$

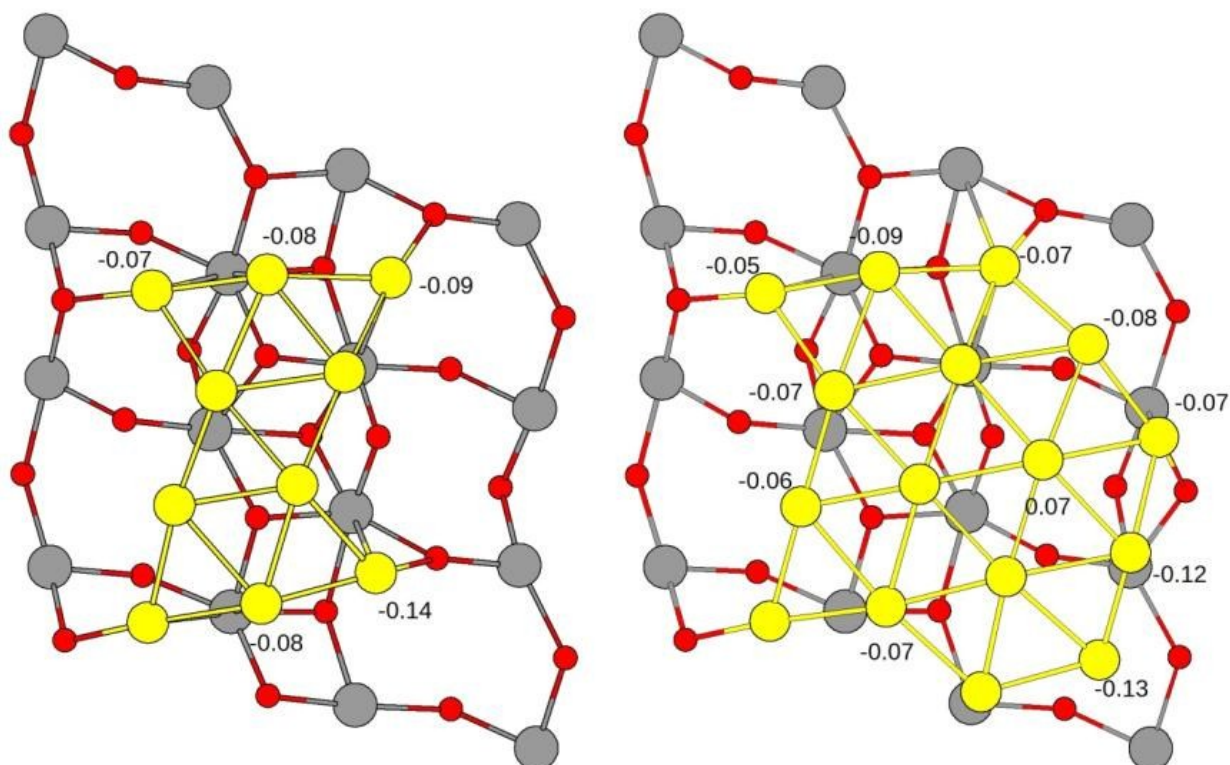

**Figure S1** The charge distributions on the Au atoms in  $\text{Au}_{10}/\text{ZrO}_2$  and  $\text{Au}_{16}/\text{ZrO}_2$ . (Only the net charges being beyond 0.05e were marked.), It is clear that the charge transfer from  $\text{ZrO}_2$  surface to the Au atoms mainly occurs on the Au atoms in the perimeter region of the  $\text{Au}_n$  cluster.

#### 4. The HOMO of the $\text{Au}_n/\text{ZrO}_2$

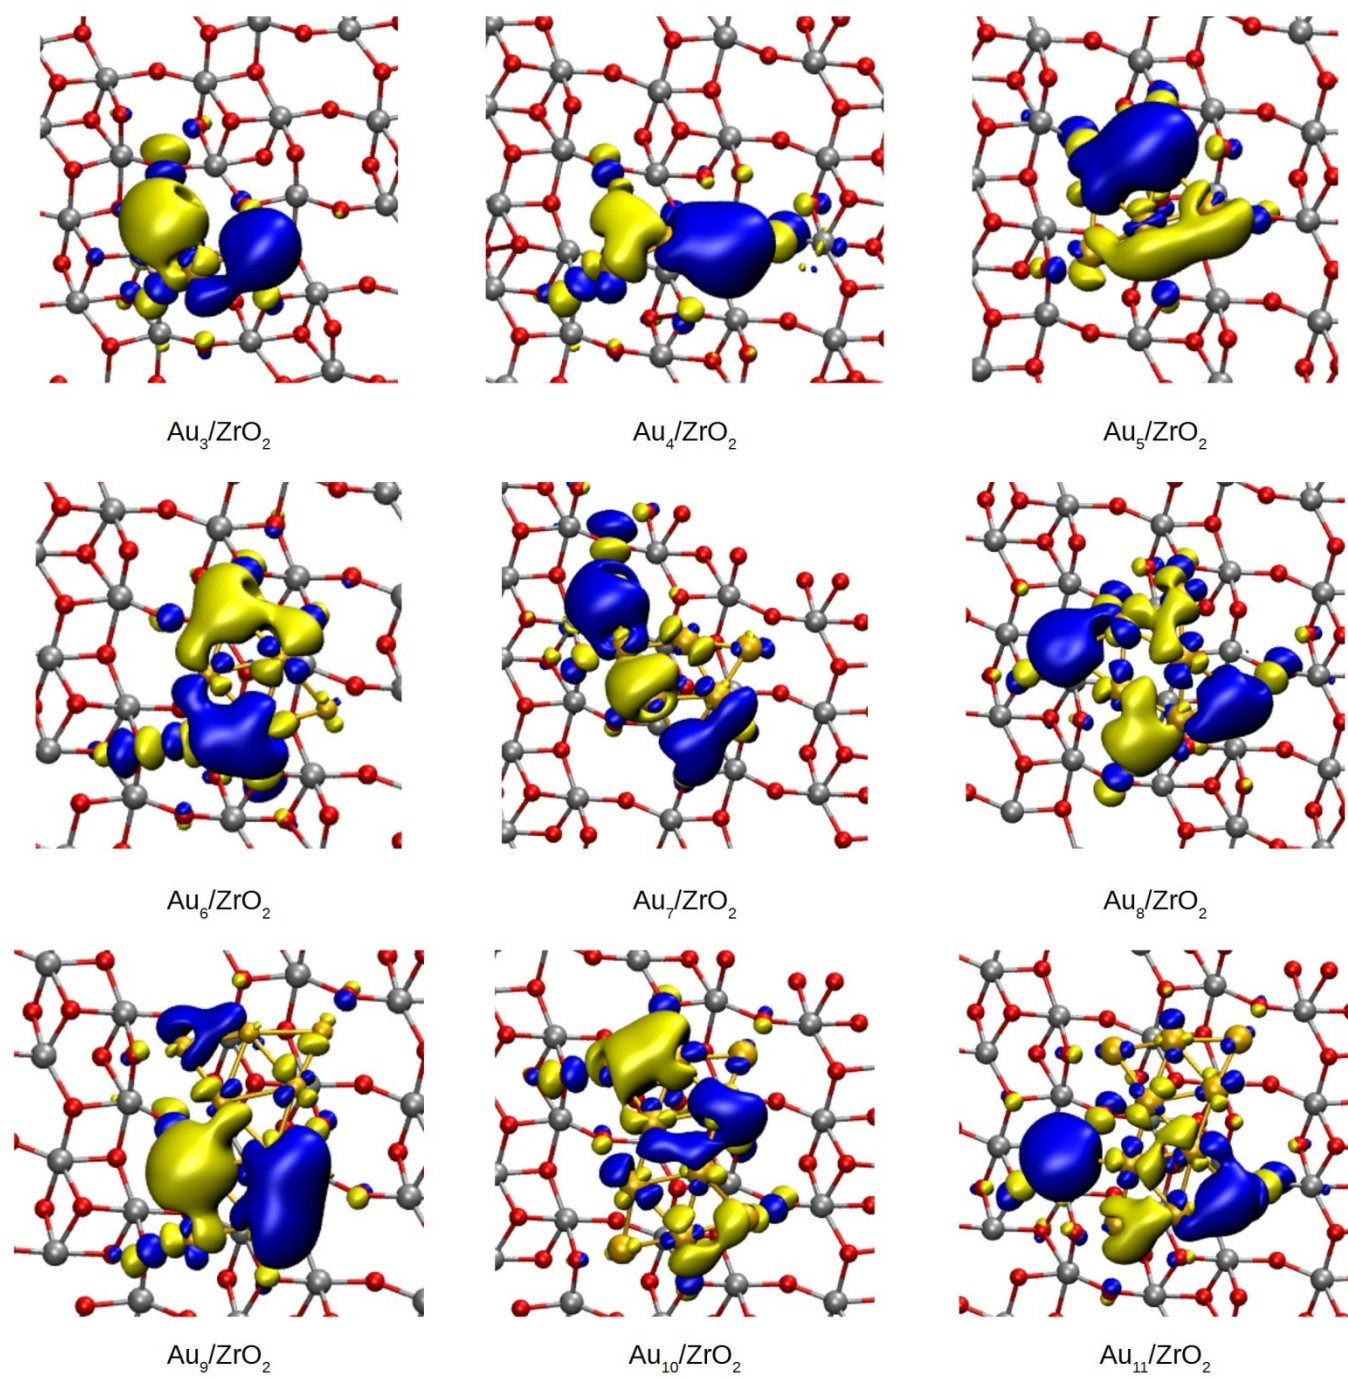

Figure S2 The HOMO of  $\text{Au}_n/\text{ZrO}_2$  ( $n=3-11$ ).

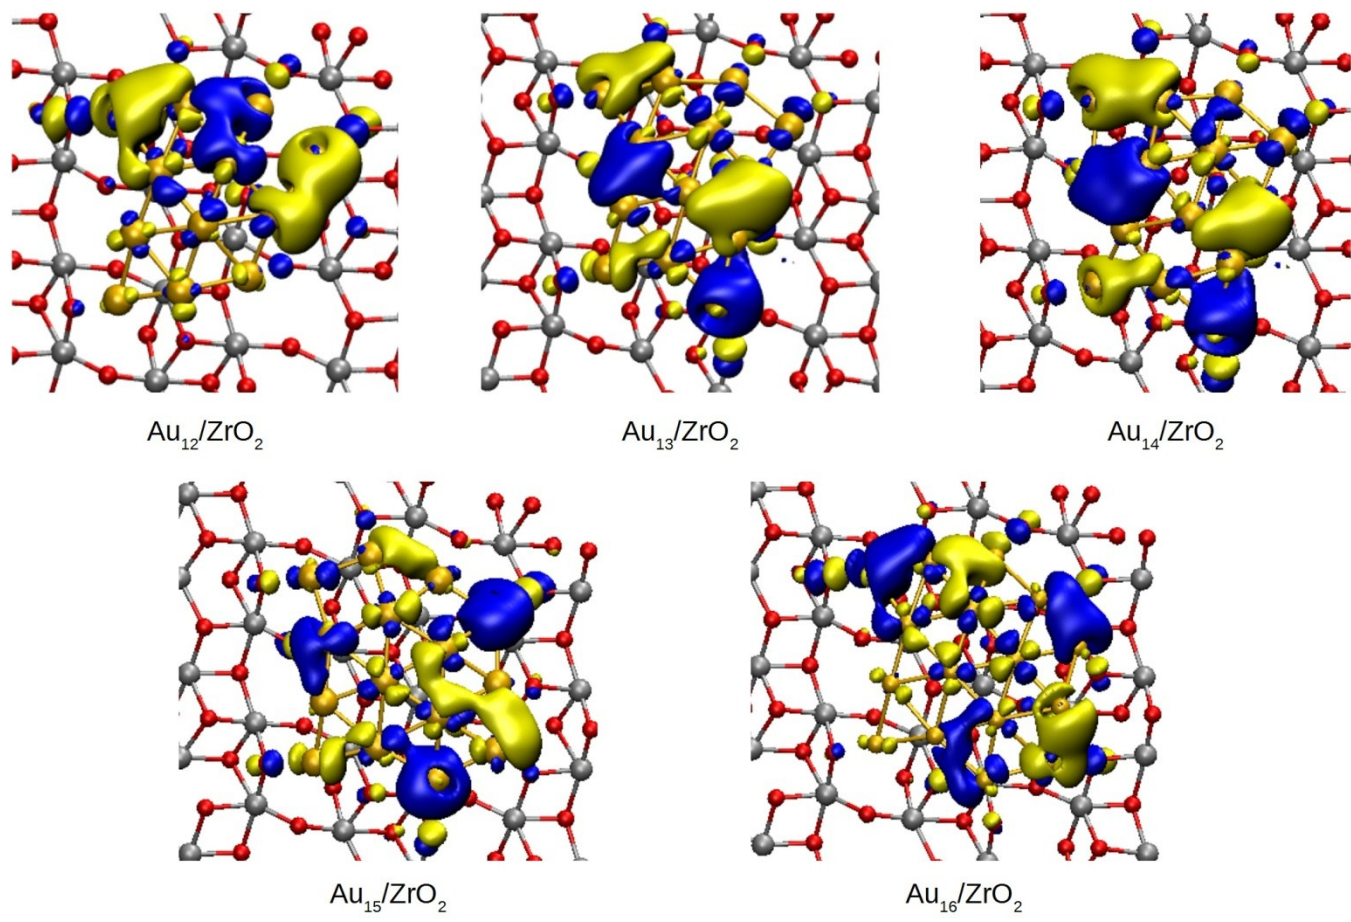

**Figure S3** The HOMOs of  $Au_n/ZrO_2$  ( $n=12-16$ )
